# Supplementary material for: Influence of energy deficiency on the subcellular processes of Substantia Nigra Pars Compacta cell for understanding Parkinsonian neurodegeneration
Source: PubMed Central journal article supplement (PMC7814067; doi:10.1038/s41598-021-81185-9), 2021-01-18
Supplement: 41598_2021_81185_MOESM1_ESM.pdf [file 41598_2021_81185_MOESM1_ESM.pdf]

## Supplementary Information

### Influence of Energy Deficiency on the Subcellular Processes of *Substantia Nigra Pars Compacta* Cell for Understanding Parkinsonian Neurodegeneration

Vignayanandam Ravindernath. Muddapu<sup>1</sup>, V. Srinivasa Chakravarthy<sup>1\*</sup>;

<sup>1</sup>Computational Neuroscience Lab, Department of Biotechnology, Bhupat and Jyoti Mehta School of Biosciences, Indian Institute of Technology Madras, Chennai, India.

\*Correspondence: V. Srinivasa Chakravarthy: [schakra@ee.iitm.ac.in](mailto:schakra@ee.iitm.ac.in)

### SUPPLEMENTARY FIGURES

#### Supplementary Figure-1

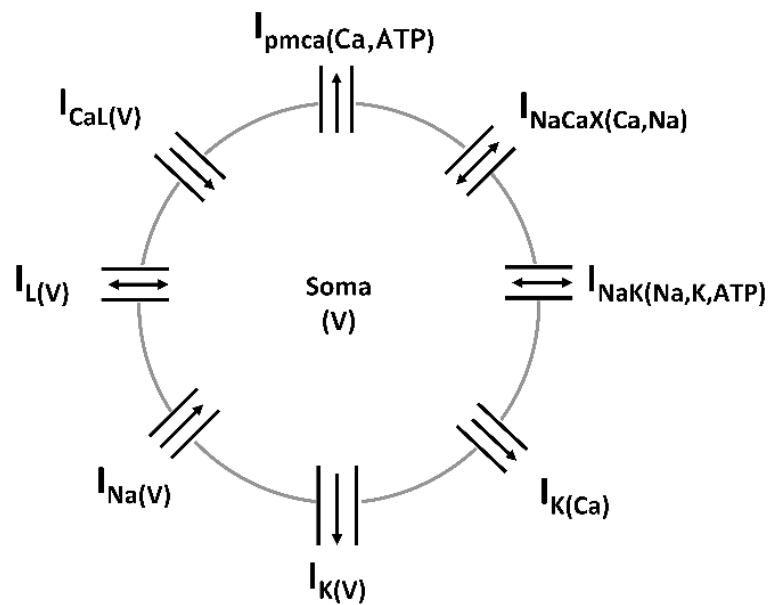

*SF-1: Schematic of the single-compartment DA neuron model demonstrating the various ion currents in the proposed model of SNc cell<sup>1</sup>. See main article for description of the figure.*

Supplementary Figure-2

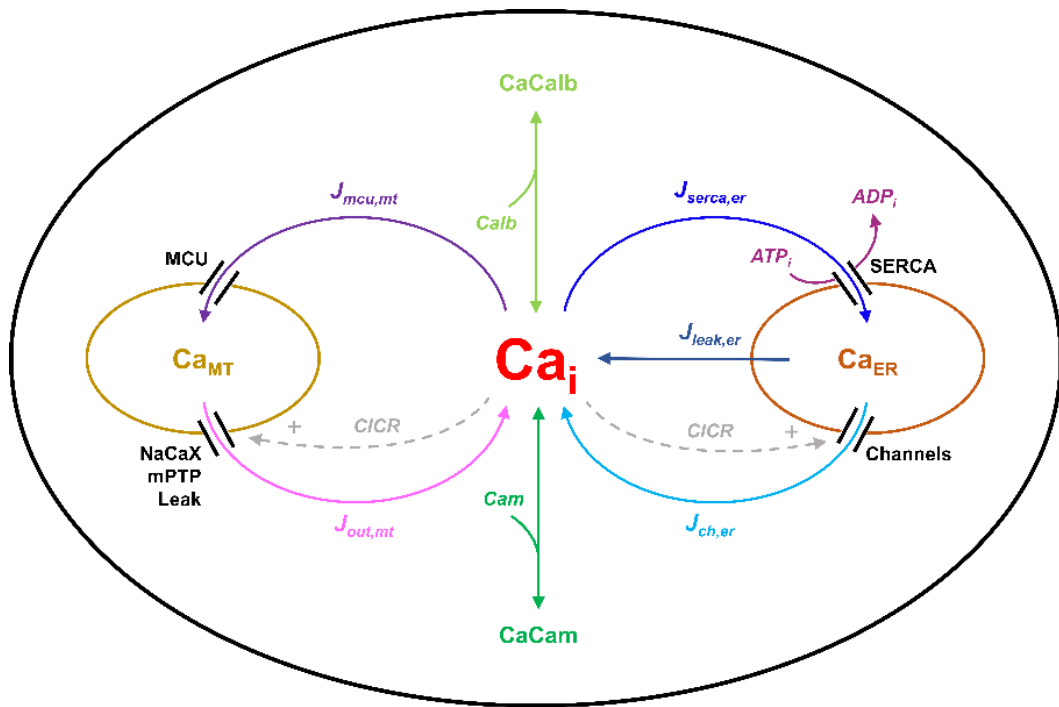

SF-2: Schematic of calcium buffering mechanisms in the proposed model of SNc cell<sup>1,2</sup>. See main article for description of the figure.

Supplementary Figure-3

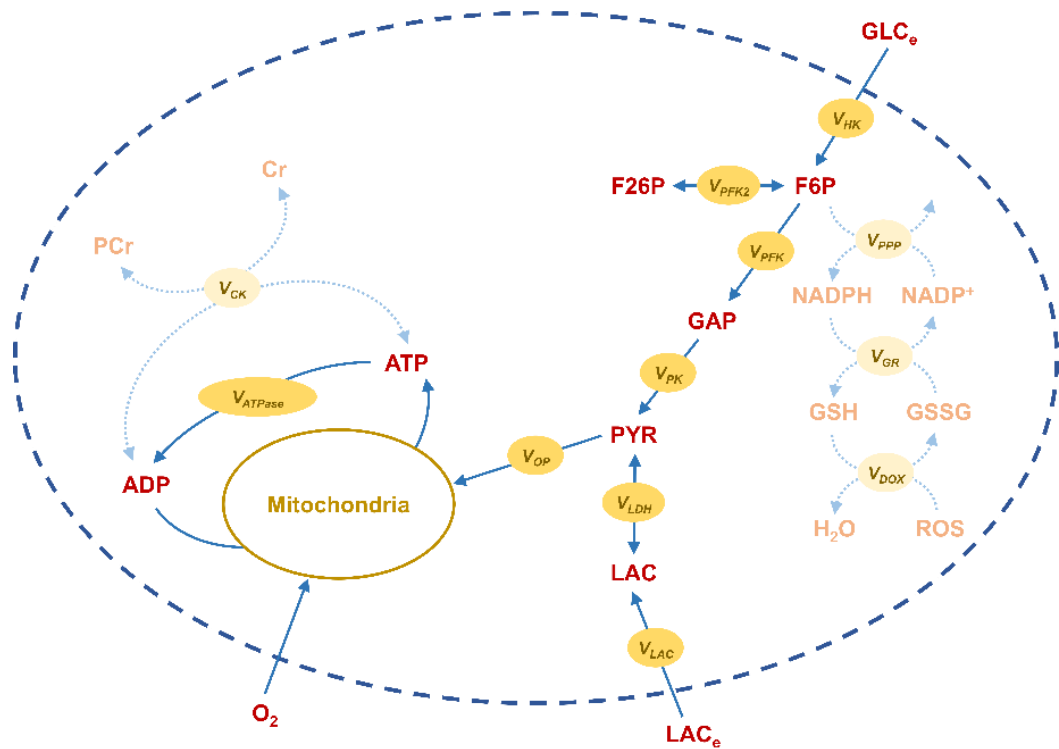

SF-3: Schematic of energy mechanism pathways in the proposed model of SNc cell<sup>3,4</sup>. See main article for description of the figure.

Supplementary Figure-4

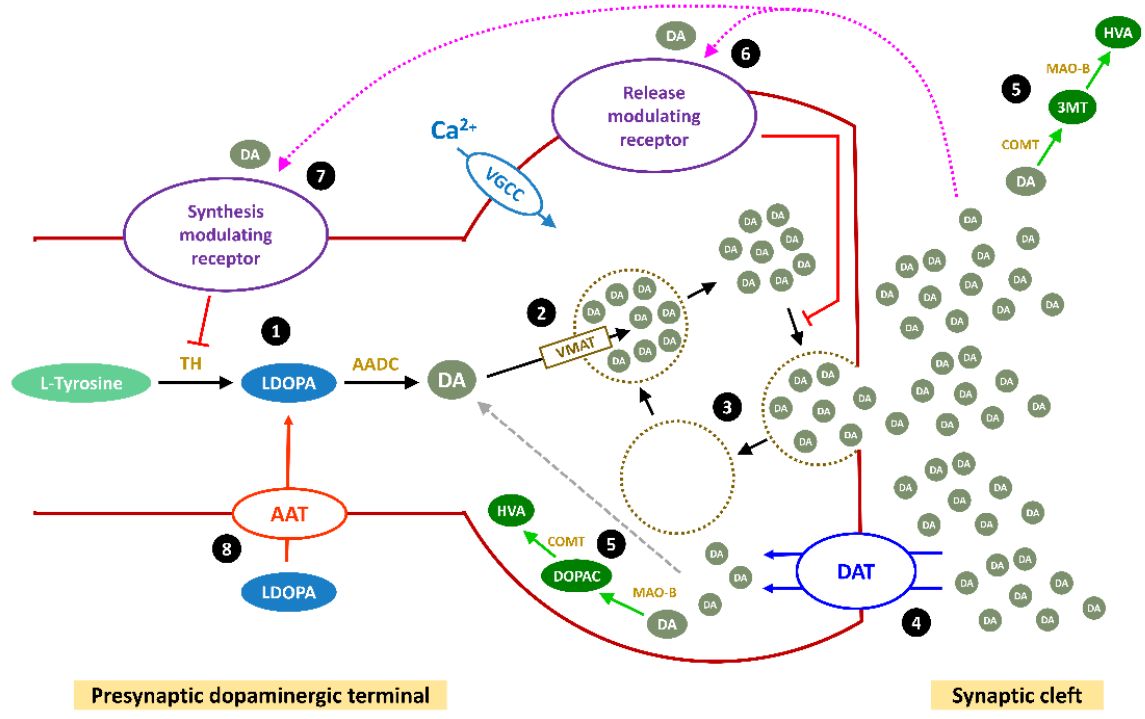

SF-4: Schematic of Dopamine turnover processes in the proposed model of SNc cell<sup>5,6</sup>. See main article for description of the figure.

Supplementary Figure-5

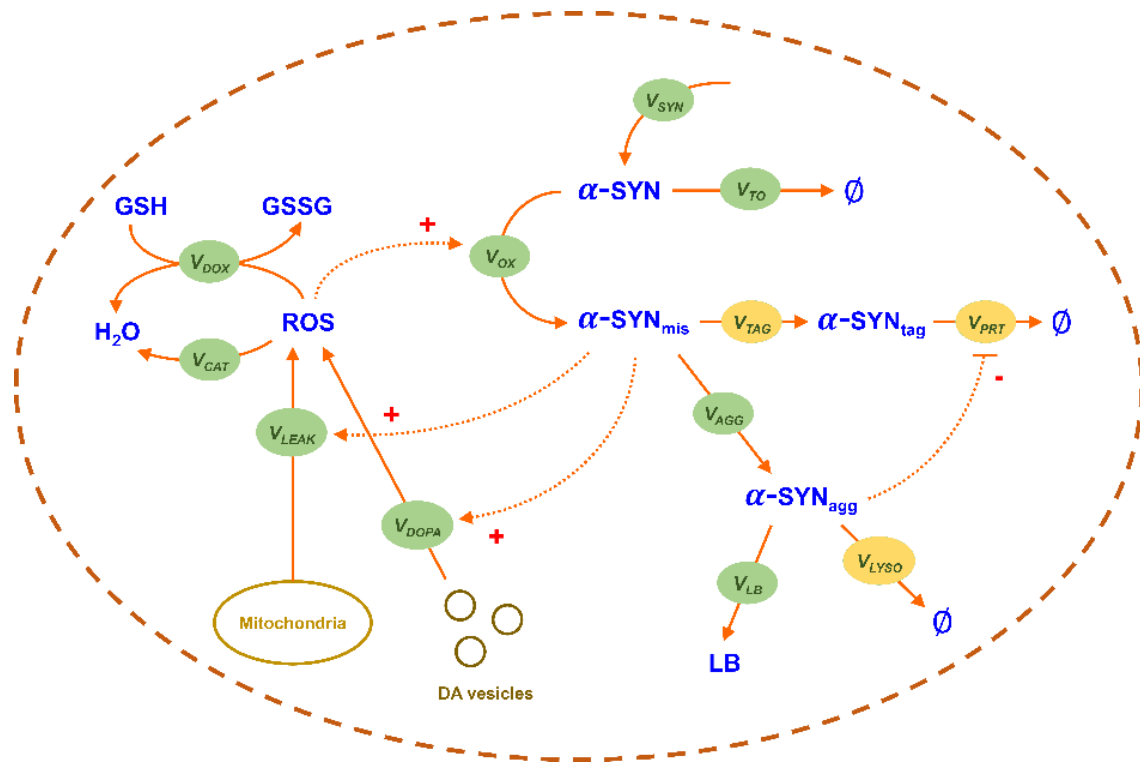

SF-5: Schematic of molecular pathways in PD pathology in the proposed model of SNc cell<sup>3,4</sup>. See main article for description of the figure.

## Supplementary Figure-6

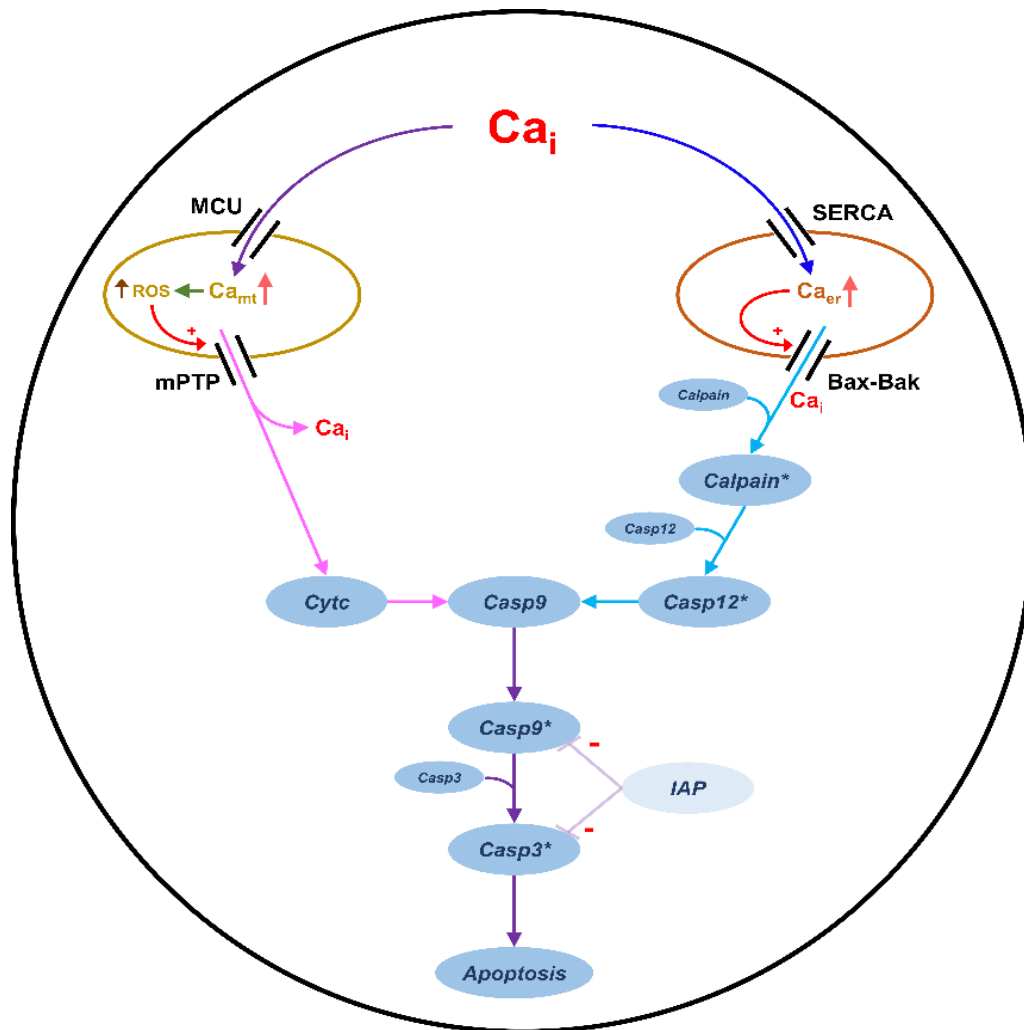

*SF-6: Schematic of Apoptotic pathways in the proposed model of SNc cell<sup>2-7</sup>. See main article for description of the figure.*

## Supplementary Figure-7

In the proposed model, ATP production by mitochondria was formulated in a single differential equation (Eq. 77) where electron transport system components were simplified to single parameter  $\bar{\eta}_{op}$  which represents maximal electron transport chain efficiency. To study the effect of electron transport system components, this parameter was varied and average basal ATP level in the cytoplasm was monitored in the model (Suppl. Fig. 7). As the electron transport system efficiency decreases, the average basal ATP level also decreases. The basal ATP level stabilizes at 1.22 mM for  $\bar{\eta}_{op}$  values lower than 0.001 and the non-mitochondrial ATP production pathways (such glycolysis, ATP–creatine phosphate system etc.) contribute to the resultant ATP level.

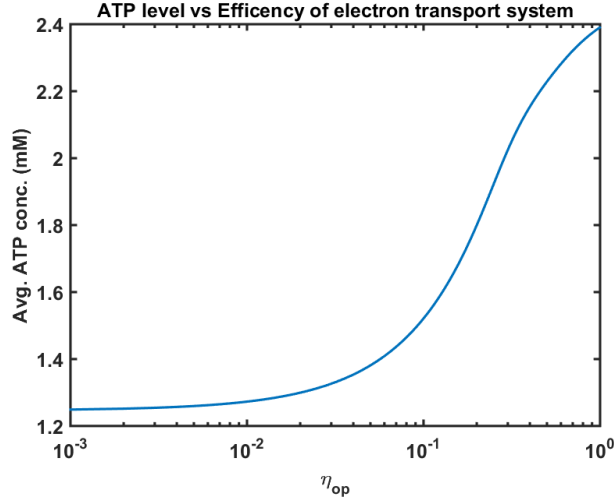

*SF-7: Average basal ATP levels as a function  $\bar{\eta}_{op}$  in the proposed model of SNc.*

### Supplementary Figure-8

In the present model, the TH activity is only regulated by extracellular and cytoplasmic dopamine (Eq. 117) and the other regulatory effects were simulated by modulating a parameter  $\bar{V}_{synt}$  which represents maximal flux for levodopa (LDOPA) synthesis (where LDOPA is converted to dopamine instantaneously by aromatic l-amino acid decarboxylase). To study the effect of TH activity on dopamine turnover processes, this parameter was varied and different molecular players (cytoplasmic dopamine, vesicular dopamine, extracellular dopamine, cytoplasmic LDOPA and cytoplasmic reactive oxygen species (ROS)) in dopamine turnover processes were monitored in the model (Figure 2). As  $\bar{V}_{synt}$  increases, LDOPA increases which leads to increased cytoplasmic dopamine. Increased cytoplasmic dopamine levels result in increased influx of dopamine from cytoplasm into vesicles which leads to increased vesicular dopamine levels resulting in increased release of dopamine into the extracellular space. Due to increased cytoplasmic dopamine, ROS levels increase as a result of excess dopamine. Furthermore, dopamine that did not sequester into vesicles undergoes autooxidation leading to elevated ROS production which results in oxidative stress-induced neuronal death.

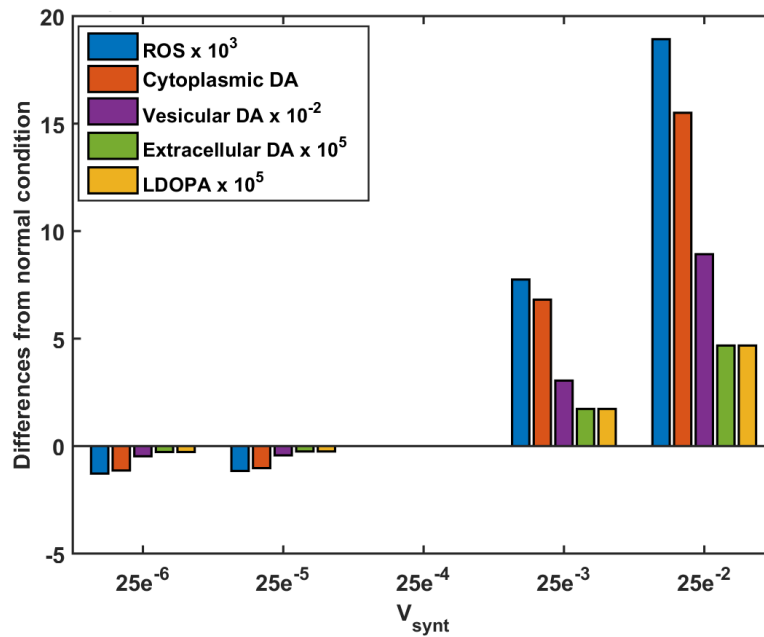

SF-8: Effect of  $\bar{V}_{synt}$  on different molecular players in dopamine turnover processes in the proposed model of SNc cell.

### Supplementary Figure-9

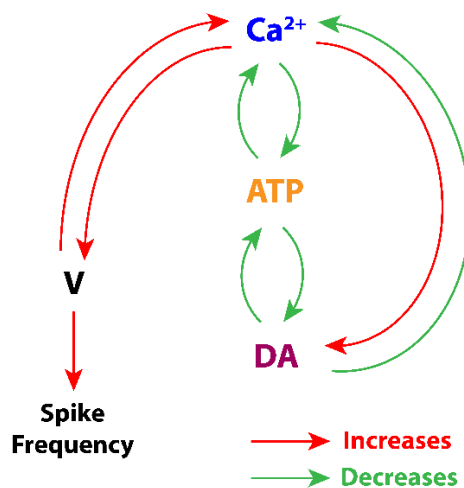

SF-9: Schematic diagram of the interaction between different important players in the proposed model of SNc cell. V, membrane potential voltage; Ca<sup>2+</sup>, cytoplasmic calcium concentration; ATP, cytoplasmic adenosine triphosphate; DA, extracellular dopamine.

### Supplementary Figure-10

At the level of single-cell studies, the neuron model exhibits multiple states, as it is shown in figure 8A; that model exhibits four dynamic regimes (in the model, high basal ATP and low

basal ATP states were observed) in which SNc neuron operates under different energy conditions. The four dynamic regimes are determined by how the basal ATP level behaves under different glucose and oxygen values. The region A was attributed to glucose and oxygen values for which no change in basal ATP level was observed. The region B was attributed to glucose and oxygen values for which there was an initial drop and subsequent return to basal ATP level. The region C was attributed to glucose and oxygen values for which there was an initial drop and a subsequent stabilization at a lower basal ATP level. The region D was attributed to glucose and oxygen values for which basal ATP level fluctuates (between high and low basal ATP levels). The region E was attributed to glucose and oxygen values for which cell undergoes degeneration (Suppl. Fig. 10).

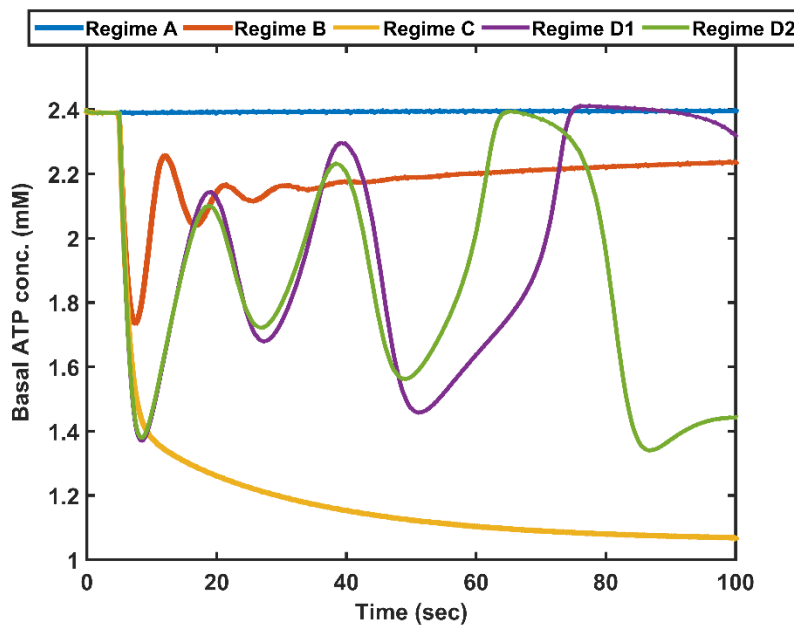

*SF-10: Different dynamic regimes in the proposed model of SNc cell under energy deficiency conditions - Basal ATP patterns.*



## SUPPLEMENTARY TABLES

**Supplementary Table-1:** Published dopaminergic neuronal models.

| S.No. | Model                                                                                      | Ion channels                                                                                                                | Pumps and exchangers (Ionic balance)                                    | Synaptic currents                                                | Reference(s) |
|-------|--------------------------------------------------------------------------------------------|-----------------------------------------------------------------------------------------------------------------------------|-------------------------------------------------------------------------|------------------------------------------------------------------|--------------|
| 1.    | Two-compartment – soma and dendrite                                                        | Soma: $I_{K,DR}$ ,<br>$I_{Na}$<br>Dendrite: $I_L$                                                                           | Dendrite:<br>$I_{NaKP}$<br>(sodium)                                     | Dendrite:<br>$I_{NMDA}$                                          | 8            |
| 2.    | Single-compartment soma with calcium buffering (CBP)                                       | Soma: $I_{Ca,T}$ ,<br>$I_{Ca,L}$ , $I_{Ca,N}$ ,<br>$I_{Ca,HVA}$ ,<br>$I_{K,Ca}$ , $I_{K,DR}$ ,<br>$I_{K,A}$ , $I_H$ , $I_B$ | Soma: $I_{NaKP}$ ,<br>$I_{CaP}$ , $I_{NaCaX}$<br>(calcium)              | -                                                                | 9            |
| 3.    | Three compartments – Soma, proximal and distal dendrites                                   | $I_{K,DR}$ , $I_L$                                                                                                          | $I_{NaKP}$<br>(sodium in all)                                           | Distal dendrite:<br>$I_{NMDA}$ ,<br>$I_{AMPA}$ ,<br>$I_{GABAA}$  | 10           |
| 4.    | <sup>9</sup> model with calcium diffusion (also abstract version)                          | Soma: $I_{Ca}$ ,<br>$I_{K,Ca}$ , $I_K$ , $I_L$                                                                              | Soma:<br>(calcium)                                                      | -                                                                | 11–13        |
| 5.    | Two <sup>10</sup> models coupled at distal dendrites                                       | $I_{Na}$ , $I_{K,DR}$ ,<br>$I_L$ , $I_{K,A}$                                                                                | $I_{NaKP}$                                                              | Distal dendrite:<br>$I_{NMDA}$                                   | 14           |
| 6.    | Soma with four identical branched dendrites with a single proximal and two distal branches | Soma: $I_{Na}$ ,<br>$I_{K,A}$ , $I_{K,DR}$ ,<br>$I_L$ , $I_{K,Ca}$ ,<br>$I_{Ca,T}$ , $I_{Ca,L}$ ,<br>$I_{Ca,N}$             | Soma: $I_{NaKP}$ ,<br>$I_{CaP}$<br>(calcium)<br>Dendrite:<br>$I_{NaKP}$ | Soma:<br>$I_{GABAA}$<br>Dendrite:<br>$I_{NMDA}$ ,<br>$I_{GABAA}$ | 15           |

|     |                                                                                                                                               |                                                                                                                                                          |                                                                                    |                                                                                |       |
|-----|-----------------------------------------------------------------------------------------------------------------------------------------------|----------------------------------------------------------------------------------------------------------------------------------------------------------|------------------------------------------------------------------------------------|--------------------------------------------------------------------------------|-------|
|     |                                                                                                                                               | Dendrite:<br>$I_{Na}, I_{K,A},$<br>$I_{K,DR}, I_L$                                                                                                       |                                                                                    |                                                                                |       |
| 7.  | Modified <sup>15</sup><br>model with<br>$I_{AMPA}$ synaptic<br>current in<br>dendrite                                                         | Soma: $I_{Na},$<br>$I_{K,A}, I_{K,DR},$<br>$I_{K,Ca}, I_L,$<br>$I_{Ca,T}, I_{Ca,L},$<br>$I_{Ca,N}$<br>Dendrite:<br>$I_{Na}, I_{K,A},$<br>$I_{K,DR}, I_L$ | Soma: $I_{NaKP},$<br>$I_{CaP}$<br>(calcium)<br>Dendrite:<br>$I_{NaKP}$<br>(sodium) | Soma:<br>$I_{GABAA}$<br>Dendrite:<br>$I_{NMDA},$<br>$I_{AMPA},$<br>$I_{GABAA}$ | 16    |
| 8.  | Modified <sup>11</sup><br>model with<br>$I_{AMPA}$ and $I_{NMDA}$<br>synaptic currents<br>along with<br>spiking<br>generating ion<br>channels | Soma: $I_{Ca},$<br>$I_{K,Ca}, I_K, I_L,$<br>$I_{Na}, I_{K,DR}$                                                                                           | Soma:<br>(calcium)                                                                 | Soma:<br>$I_{NMDA},$<br>$I_{AMPA}$                                             | 17    |
| 9.  | Single-<br>compartment<br>soma                                                                                                                | Soma: $I_{Ca,L},$<br>$I_{Ca,B}, I_{K,ERG},$<br>$I_{K,Ca}, I_H, I_L$                                                                                      | Soma: $I_{CaP}$<br>(calcium)                                                       | -                                                                              | 18    |
| 10. | Modified <sup>15</sup><br>model with<br>pacemaking<br>mechanism<br>throughout soma<br>and dendrites                                           | Soma: $I_{Na},$<br>$I_A, I_{K,DR}, I_L,$<br>$I_{K,Ca}, I_{Ca,L}$<br>Dendrite:<br>$I_{Na}, I_A,$<br>$I_{K,DR}, I_L,$<br>$I_{K,Ca}, I_{Ca,L}$              | Soma:<br>(calcium)                                                                 | -                                                                              | 19,20 |
| 11. | Single-<br>compartment<br>soma                                                                                                                | Soma: $I_{Ca,L},$<br>$I_{Na}, I_{K,DR},$<br>$I_{K,Ca}, I_L$                                                                                              | Soma: $I_{CaP}$<br>(calcium)                                                       | -                                                                              | 21    |

|     |                                                                                                                       |                                                                                                         |                                                                                                                  |                                      |       |
|-----|-----------------------------------------------------------------------------------------------------------------------|---------------------------------------------------------------------------------------------------------|------------------------------------------------------------------------------------------------------------------|--------------------------------------|-------|
| 12. | Single-compartment soma which is combines conductance mechanisms from <sup>9</sup> and <sup>17</sup>                  | Soma: $I_{Ca,L}$ ,<br>$I_{Na}$ , $I_{K,DR}$ ,<br>$I_{K,Ca}$ , $I_L$ , $I_K$                             | Soma: $I_{CaP}$<br>(calcium)                                                                                     | Soma:<br>$I_{NMDA}$ ,<br>$I_{GABAA}$ | 22    |
| 13. | Single-compartment soma with calcium buffering (CBP)                                                                  | Soma: $I_{Ca,L}$ ,<br>$I_{Na}$ , $I_{Na,HCN}$ ,<br>$I_{L,Na}$ , $I_{K,DR}$ ,<br>$I_{L,IR}$ , $I_{K,Ca}$ | Soma: $I_{NaKP}$ ,<br>$I_{CaP}$ , $I_{NaCaX}$<br>(calcium,<br>sodium,<br>potassium,<br>calbindin,<br>calmodulin) | -                                    | 1     |
| 14. | Modified <sup>17</sup> model with altered NMDA and $I_{K,ERG}$ along with full morphology of dendrite (reduced model) | Soma: $I_{Ca,L}$ ,<br>$I_{Na}$ , $I_{K,DR}$ ,<br>$I_{K,Ca}$ , $I_L$ ,<br>$I_{K,ERG}$                    | Soma: $I_{CaP}$<br>(calcium)                                                                                     | Soma:<br>$I_{NMDA}$ ,<br>$I_{AMPA}$  | 23,24 |
| 15. | Single-compartment soma                                                                                               | Soma: $I_{Na}$ ,<br>$I_{K,DR}$ , $I_L$ ,                                                                | -                                                                                                                | Soma:<br>$I_{NMDA}$ ,<br>$I_{AMPA}$  | 25    |
| 16. | Single-compartment soma with full morphology of dendrite                                                              | Soma: $I_{Ca}$ ,<br>$I_{Na}$ , $I_{K,DR}$ ,<br>$I_{K,Ca}$ , $I_{L,Ca}$ ,<br>$I_{K,ERG}$ , $I_H$ , $I_L$ | Soma: $I_{CaP}$<br>(calcium)                                                                                     | -                                    | 26    |
| 17. | Simple (spiking) dopaminergic neuronal model                                                                          | Izhikevich (point neuron) – two variable neuronal model                                                 | -                                                                                                                | -                                    | 27,28 |

|     |                                                                                          |                                                                                                                                       |                              |                                                      |       |
|-----|------------------------------------------------------------------------------------------|---------------------------------------------------------------------------------------------------------------------------------------|------------------------------|------------------------------------------------------|-------|
| 18. | Modified <sup>23</sup>                                                                   | Soma: $I_{Ca}$ ,<br>$I_{Na}$ , $I_{Na,S}$ ,<br>$I_{K,DR}$ , $I_{K,Ca}$ ,<br>$I_L$ , $I_K$ , $I_H$                                     | Soma: $I_{CaP}$<br>(calcium) | Soma:<br>$I_{NMDA}$ ,<br>$I_{AMPA}$ ,<br>$I_{GABAA}$ | 29,30 |
| 19. | Single-compartment soma with calcium buffering (CBP) along $I_{K,ATP}$ mediated bursting | Soma: $I_{Ca,L}$ ,<br>$I_{Na}$ , $I_{K,DR}$ ,<br>$I_{K,ATP}$ , $I_{L,Ca}$ ,<br>$I_L$                                                  | Soma: $I_{CaP}$<br>(calcium) | Soma:<br>$I_{NMDA}$                                  | 31    |
| 20. | Modified <sup>19</sup> model                                                             | $I_{Ca,L}$ , $I_{Ca,T}$ ,<br>$I_{Na}$ , $I_{Na,HCN}$ ,<br>$I_{K,DR}$ , $I_{K,B}$ ,<br>$I_{K,Ca}$ , $I_{K,A}$ ,<br>$I_{K,ERG}$ , $I_L$ | Soma: $I_{CaP}$<br>(calcium) | -                                                    | 32    |

$I_{Ca,T}$  – T-type calcium current;  $I_{Ca,L}$  – L-type calcium current;  $I_{Ca,N}$  – N-type calcium current;  $I_{Ca,HVA}$  – residual high-voltage activated calcium current;  $I_{Ca}$  – calcium current;  $I_{K,Ca}$  – calcium-activated (small conductance) potassium current;  $I_{K,DR}$  – delayed rectifier potassium current;  $I_{K,A}$  – transient outward (4-aminopyridine-sensitive) potassium current;  $I_H$  – hyperpolarization-activated cation current;  $I_B$  – background current (sodium, potassium, calcium);  $I_{NaKP}$  – sodium-potassium pump;  $I_{CaP}$  – calcium pump;  $I_{NaCaX}$  – sodium-calcium exchanger;  $I_L$  – leaky current;  $I_{Na}$  – fast spiking (tetrodotoxin-sensitive) sodium current;  $I_{NMDA}$  – N-methyl-D-aspartic acid (NMDA) current;  $I_{AMPA}$  – alpha-amino-3-hydroxy-5-methyl-4-isoxazolepropionic acid (AMPA) current;  $I_{GABAA}$  – gamma-aminobutyric acid A-class (GABAA) current;  $I_{K,ERG}$  – ERG (ether-a-go-go-related gene) potassium current;  $I_{Ca,B}$  – background calcium leak current;  $I_{L,Ca}$  – leaky calcium current; CBP – calcium-binding proteins;  $I_{L,Na}$  – leaky sodium current;  $I_{K,IR}$  – inward rectifying potassium current;  $I_{Na,HCN}$  – hyperpolarization-activated cyclic nucleotide (HCN) sodium current;  $I_{Na,S}$  – subthreshold sodium current;  $I_K$  – intrinsic potassium current;  $I_{K,ATP}$  – ATP-sensitive potassium current;  $I_{K,B}$  – large conductance potassium current;

**Supplementary Table-2:** Published dopaminergic terminal models.

| S.No. | Model                                                        | Metabolite balance (units)                                                 | Autoreceptors            | Reference(s) |
|-------|--------------------------------------------------------------|----------------------------------------------------------------------------|--------------------------|--------------|
| 1.    | Two-compartment – cytoplasmic and extracellular              | $DA_c, DA_v, DA_e, LDOPA, I1, I2$<br>(nmol/g, min)                         | DA synthesis             | 33           |
| 2.    | Two-compartment – cytoplasmic and extracellular              | $DA_i, DA_e$<br>( $\mu$ g/g, min)                                          | DA firing                | 34           |
| 3.    | Three-compartment – cytoplasmic, vesicular and extracellular | $DA_c, DA_v, DA_e, DA_a, DA_g, 3MT, LDOPA, DOPAC, HVA$<br>(mM, ms)         | -                        | 35           |
| 4.    | Biochemical systems theory model                             | DA homeostasis<br>(relative units)                                         | -                        | 36,37        |
| 5.    | Three-compartment – cytoplasmic, vesicular and extracellular | $DA_c, DA_v, DA_e, TYR, LDOPA, BH_2, BH_4, HVA, TYRPOOL$<br>( $\mu$ M, hr) | DA synthesis             | 38,39        |
| 6.    | Three-compartment – cytoplasmic, vesicular and extracellular | $DA_c, DA_v, DA_e$<br>(mM, ms)                                             | DA synthesis, DA release | 6            |

|     |                                                                           |                                                                                                                                                                                                                               |                                                    |       |
|-----|---------------------------------------------------------------------------|-------------------------------------------------------------------------------------------------------------------------------------------------------------------------------------------------------------------------------|----------------------------------------------------|-------|
| 7.  | Modified <sup>38</sup> model with DA and 5HT cell bodies and 5HT terminal | DA terminal: $DA_c$ , $DA_v$ , $DA_e$ , $TYR$ , $LDOPA$ , $BH_2$ , $BH_4$ , $HVA$ , $TYRPOOL$<br><br>5HT terminal: $5HT_c$ , $5HT_v$ , $5HT_e$ , $TRYP$ , $5HTP$ , $BH_2$ , $BH_4$ , $HIA$ , $TRPPOOL$<br><br>( $\mu M$ , hr) | DA synthesis, DA firing, 5HT synthesis, 5HT firing | 5     |
| 8.  | DA neurotransmission model                                                | Volume transmission<br><br>( $\mu M$ , sec)                                                                                                                                                                                   | DA firing, DA release                              | 40,41 |
| 9.  | Systems Biology Markup Language model                                     | Flux balance analysis<br><br>( $\mu M$ , hr)                                                                                                                                                                                  | -                                                  | 42    |
| 10. | Modified <sup>38</sup> model with spiking neuronal model                  | DA terminal: $DA_c$ , $DA_v$ , $DA_e$ , $TYR$ , $LDOPA$ , $BH_2$ , $BH_4$ , $HVA$ , $TYRPOOL$<br><br>( $\mu M$ , hr)                                                                                                          | DA synthesis, DA firing                            | 27    |

$DA$  – dopamine;  $5HT$  – serotonin;  $DA_c$  – cytoplasmic DA;  $DA_v$  – vesicular DA;  $DA_e$  – extracellular DA;  $DA_a$  – inactive DA;  $DA_g$  – glial DA;  $TH$  – tyrosine hydroxylase;  $I1$  – competitive TH inhibitor 1;  $I2$  – competitive TH inhibitor 2;  $LDOPA$  – 3,4-dihydroxyphenylalanine;  $3MT$  – 3-methoxytyramine;  $DOPAC$  – 3,4-dihydroxyphenylacetic acid;  $HVA$  – homovanillic acid;  $TYR$  – tyrosine;  $BH_2$  – dihydrobiopterin;  $BH_4$  – tetrahydrobiopterin;  $TYRPOOL$  – tyrosine pool;  $5HT_c$  – cytoplasmic 5HT;  $5HT_v$  – vesicular 5HT;  $5HT_e$  – extracellular 5HT;  $5HTP$  – 5-hydroxytryptophan;  $HIA$  – 5-hydroxyindoleacetic acid;  $TRYP$  – tryptophan;  $TRPPOOL$  – tryptophan pool;  $\mu M$  – micromolar;  $mM$  – millimolar;

*ms* – millisecond; *hr* – hour;  $DA_i$  – intracellular DA; nmol – nanomole; g – gram; min – minute.

**Supplementary Table-3:**

**Supplementary Table-3.1:** Parameter values for ion-channel dynamics of SNe cell model<sup>1</sup>.

| Constant                                 | Symbol           | Value                                                  | Units                                         |
|------------------------------------------|------------------|--------------------------------------------------------|-----------------------------------------------|
| Faraday's constant                       | $F$              | 96485                                                  | <i>coulomb * mole<sup>-1</sup></i>            |
| SNe membrane capacitance                 | $C_{snc}$        | $9 \times 10^7$                                        | <i>pF * cm<sup>-2</sup></i>                   |
| Cytosolic volume                         | $vol_{cyt}$      | $\phi_{cyt} * vol_{pmu}$                               | <i>pl</i>                                     |
| Fraction of cytosolic volume             | $\phi_{cyt}$     | 0.5                                                    | <i>dimensionless</i>                          |
| Pacemaking unit (PMU) volume             | $vol_{pmu}$      | 5                                                      | <i>pl</i>                                     |
| PMU area                                 | $AR_{pmu}$       | $\delta_{pmu} * vol_{pmu}$                             | <i>pl * cm<sup>-1</sup></i>                   |
| PMU surface area-to-volume ratio         | $\delta_{pmu}$   | $1.6667 \times 10^4$                                   | <i>cm<sup>-1</sup></i>                        |
| Voltage defined thermodynamic entity     | $V_D$            | $\frac{V}{V_\tau}$                                     | <i>dimensionless</i>                          |
| Temperature defined thermodynamic entity | $V_\tau$         | $\frac{R * T}{F}$                                      | <i>mV</i>                                     |
| Universal gas constant                   | $R$              | 8314.472                                               | <i>mJ * mol<sup>-1</sup> * K<sup>-1</sup></i> |
| Physiological temperature                | $T$              | 310.15                                                 | <i>K</i>                                      |
| Maximal conductance of calcium channel   | $\bar{g}_{Ca,L}$ | 2101.2                                                 | <i>pA * mM<sup>-1</sup></i>                   |
| Extracellular calcium concentration      | $[Ca_e]$         | 1.8                                                    | <i>mM</i>                                     |
| Reversal potential for calcium ion       | $V_{Ca}$         | $\frac{1}{2} * \log\left(\frac{[Ca_e]}{[Ca_i]}\right)$ | <i>dimensionless</i>                          |
| Valence of calcium ion                   | $z_{Ca}$         | 2                                                      | <i>dimensionless</i>                          |

|                                                             |                   |                                          |                      |
|-------------------------------------------------------------|-------------------|------------------------------------------|----------------------|
| Maximal conductance of sodium channel                       | $\bar{g}_{Na}$    | 907.68                                   | $pA * mM^{-1}$       |
| Extracellular sodium concentration                          | $[Na_e]$          | 137                                      | $mM$                 |
| Reversal potential for sodium ion                           | $V_{Na}$          | $\log\left(\frac{[Na_e]}{[Na_i]}\right)$ | <i>dimensionless</i> |
| Valence of sodium ion                                       | $z_{Na}$          | 1                                        | <i>dimensionless</i> |
| Maximal conductance of sodium HCN channel                   | $\bar{g}_{NaHCN}$ | 51.1                                     | $pA * mM^{-1}$       |
| Maximal conductance of leaky sodium channel                 | $\bar{g}_{Nalk}$  | 0.0053                                   | $pA * mM^{-1}$       |
| Cyclic adenosine monophosphate concentration                | $[cAMP]$          | $1 \times 10^{-5}$                       | $mM$                 |
| Maximal conductance of delayed rectifying potassium channel | $\bar{g}_{Kdr}$   | 31.237                                   | $nS$                 |
| Extracellular potassium concentration                       | $[K_e]$           | 5.4                                      | $mM$                 |
| Reversal potential for potassium ion                        | $V_K$             | $\log\left(\frac{[K_e]}{[K_i]}\right)$   | <i>dimensionless</i> |
| Valence of potassium ion                                    | $z_K$             | 1                                        | <i>dimensionless</i> |
| Maximal conductance of inward rectifying potassium channel  | $\bar{g}_{Kir}$   | 13.816                                   | $nS$                 |
| Maximal conductance of small conductance potassium channel  | $\bar{g}_{Ksk}$   | 2.2515                                   | $pA * mM^{-1}$       |
| Maximal conductance for sodium-potassium ATPase             | $K_{nak}$         | 1085.7                                   | $pA$                 |
| Reaction rates of $I_{NaK}$                                 | $k_{2,nak}$       | 0.04                                     | $ms^{-1}$            |



|                                                  |                    |        |                      |
|--------------------------------------------------|--------------------|--------|----------------------|
|                                                  | $k_{3,nak}$        | 0.01   | $ms^{-1}$            |
|                                                  | $k_{4,nak}$        | 0.165  | $ms^{-1}$            |
| Dissociation constants of $I_{NaK}$              | $K_{nak,nae}$      | 69.8   | $mM$                 |
|                                                  | $K_{nak,nai}$      | 4.05   | $mM$                 |
|                                                  | $K_{nak,ke}$       | 0.258  | $mM$                 |
|                                                  | $K_{nak,ki}$       | 32.88  | $mM$                 |
| Maximal conductance for calcium ATPase           | $k_{pmca}$         | 2.233  | $pA * ms^{-1}$       |
| Reaction rates of $I_{pmca}$                     | $k_{2,pc}$         | 0.001  | $ms^{-1}$            |
|                                                  | $k_{3,pc}$         | 0.001  | $ms^{-1}$            |
|                                                  | $k_{4,pc}$         | 1      | $ms^{-1}$            |
| Dissociation constants of $I_{pmca}$             | $K_{pc,e}$         | 2      | $mM$                 |
| Maximal conductance for sodium-calcium exchanger | $k_{xm}$           | 0.0166 | $pA * ms^{-1}$       |
| Energy barrier parameter of $I_{NaCaX}$          | $\delta_{xm}$      | 0.35   | <i>dimensionless</i> |
| Denominator factor of $I_{NaCaX}$                | $\mathcal{D}_{xm}$ | 0.001  | <i>dimensionless</i> |

**Supplementary Table-3.2:** Steady state values of ion-channel dynamics of SNc cell model<sup>1</sup>.

| Symbol   | Value                    | Symbol      | Value  |
|----------|--------------------------|-------------|--------|
| $V$      | $-49.42 mV$              | $h_{Na}$    | 0.1848 |
| $[Ca_i]$ | $1.88 \times 10^{-4} mM$ | $O_{NaHCN}$ | 0.003  |
| $[Na_i]$ | $4.69 mM$                | $m_{K,dr}$  | 0.003  |
| $[K_i]$  | $126.06 mM$              | $y_{nak}$   | 0.6213 |

|          |        |          |       |
|----------|--------|----------|-------|
| $m_{Na}$ | 0.0952 | $y_{pc}$ | 0.483 |
|----------|--------|----------|-------|

**Supplementary Table-3.3:** Parameter values of calcium buffering mechanisms of SNe cell model<sup>1,2</sup>.

| Constant                                                            | Symbol         | Value              | Units                |
|---------------------------------------------------------------------|----------------|--------------------|----------------------|
| Calbindin reaction rates                                            | $k_{1,calb}$   | 10                 | $mM^{-1} * ms^{-1}$  |
|                                                                     | $k_{2,calb}$   | $2 \times 10^{-3}$ | $ms^{-1}$            |
| Total cytosolic calbindin concentration                             | $[Calb_{tot}]$ | 0.005              | $mM$                 |
| Calmodulin reaction rates                                           | $k_{cam}^{cb}$ | 12000              | $mM^{-2} * ms^{-1}$  |
|                                                                     | $k_{cam}^{nb}$ | $3.7 \times 10^6$  | $mM^{-2} * ms^{-1}$  |
|                                                                     | $k_{cam}^{cd}$ | $3 \times 10^{-3}$ | $ms^{-1}$            |
|                                                                     | $k_{cam}^{nd}$ | 3                  | $ms^{-1}$            |
| Total cytosolic calmodulin concentration                            | $[Cam_{tot}]$  | 0.0235             | $mM$                 |
| The maximal rate constant of SERCA                                  | $k_{serca,er}$ | 0.02               | $mM^{-1} * ms^{-1}$  |
| Maximal permeability of calcium channels in the ER membrane         | $k_{ch,er}$    | 3                  | $ms^{-1}$            |
| Half saturation for calcium                                         | $K_{ch,er}$    | 0.005              | $mM$                 |
| Maximal rate constant for calcium leak flux through the ER membrane | $k_{leak,er}$  | $5 \times 10^{-5}$ | $ms^{-1}$            |
| Ratio of free calcium to total calcium concentration in ER          | $\beta_{er}$   | 0.0025             | <i>dimensionless</i> |

|                                                                              |               |                       |                      |
|------------------------------------------------------------------------------|---------------|-----------------------|----------------------|
| Volume ratio between the ER and cytosol                                      | $\rho_{er}$   | 0.01                  | <i>dimensionless</i> |
| Maximal permeability of MCUs                                                 | $k_{mcu,mt}$  | $3 \times 10^{-4}$    | $mM * ms^{-1}$       |
| Half saturation for calcium                                                  | $K_{mcu,mt}$  | $8 \times 10^{-4}$    | $mM$                 |
| Maximal rate of calcium flux through $[Na^+]/[Ca^{2+}]$ exchangers and mPTPs | $k_{out,mt}$  | 0.125                 | $ms^{-1}$            |
| Half saturation for calcium                                                  | $K_{out,mt}$  | 0.005                 | $mM$                 |
| Maximal rate constant for calcium leak flux through the MT membrane          | $k_{leak,mt}$ | $6.25 \times 10^{-6}$ | $ms^{-1}$            |
| Ratio of free calcium to total calcium concentration in MT                   | $\beta_{mt}$  | 0.0025                | <i>dimensionless</i> |
| Volume ratio between the MT and cytosol                                      | $\rho_{mt}$   | 0.01                  | <i>dimensionless</i> |

**Supplementary Table-3.4:** Steady state values of calcium buffering mechanisms of SNc cell model <sup>1,2</sup>.

| <b>Symbol</b> | <b>Value</b>          | <b>Symbol</b> | <b>Value</b>            |
|---------------|-----------------------|---------------|-------------------------|
| $[Ca_{er}]$   | $1 \times 10^{-3} mM$ | $[Calb]$      | $26 \times 10^{-4} mM$  |
| $[Ca_{mt}]$   | $4 \times 10^{-4} mM$ | $[Cam]$       | $222 \times 10^{-4} mM$ |

**Supplementary Table-3.5:** Parameter values of energy metabolism of SNc cell model<sup>3,4</sup>.

| <b>Constant</b>                     | <b>Symbol</b>  | <b>Value</b>         | <b>Units</b>   |
|-------------------------------------|----------------|----------------------|----------------|
| Extracellular glucose concentration | $[GLC_e]$      | 1                    | $mM$           |
| Hexokinase maximal flux             | $\bar{v}_{hk}$ | $2.5 \times 10^{-3}$ | $mM * ms^{-1}$ |

|                                            |                    |                        |                             |
|--------------------------------------------|--------------------|------------------------|-----------------------------|
| Affinity constant for ATP                  | $K_{m,ATP,hk}$     | 0.5                    | <i>mM</i>                   |
| Inhibition constant for F6P                | $K_{i,F6P}$        | 0.068                  | <i>mM</i>                   |
| Phosphofructokinase maximal flux           | $\bar{v}_{pfk}$    | $3.8 \times 10^{-3}$   | <i>mM * ms<sup>-1</sup></i> |
| Affinity constant for F6P                  | $K_{m,F6P,pfk}$    | 0.18                   | <i>mM</i>                   |
| Affinity constant for ATP                  | $K_{m,ATP,pfk}$    | 0.05                   | <i>mM</i>                   |
| Affinity constant for F26P                 | $K_{m,F26P,pfk}$   | 0.01                   | <i>mM</i>                   |
| Activation constant for AMP                | $K_{a,AMP,pfk}$    | 0.05                   | <i>mM</i>                   |
| Inhibition constant for ATP                | $K_{i,ATP}$        | 1                      | <i>mM</i>                   |
| Coefficient constant for AMP               | $n_{AMP}$          | 0.5                    | <i>dimensionless</i>        |
| Coefficient constant for ATP               | $n_{ATP}$          | 0.4                    | <i>dimensionless</i>        |
| Total energy shuttles concentration        | [ANP]              | 2.51                   | <i>mM</i>                   |
| Coefficient constant for ADP               | $Q_{adk}$          | 0.92                   | <i>dimensionless</i>        |
| Phosphofructokinase-2 maximal forward flux | $\bar{v}_{pfk2,f}$ | $2 \times 10^{-7}$     | <i>mM * ms<sup>-1</sup></i> |
| Phosphofructokinase-2 maximal reverse flux | $\bar{v}_{pfk2,r}$ | $1.036 \times 10^{-7}$ | <i>mM * ms<sup>-1</sup></i> |
| Affinity constant for F6P                  | $K_{m,F6P,pfk2}$   | 0.01                   | <i>mM</i>                   |
| Affinity constant for ATP                  | $K_{m,ATP,pfk2}$   | 0.05                   | <i>mM</i>                   |
| Affinity constant for F26P                 | $K_{m,F26P,pfk2}$  | 0.0001                 | <i>mM</i>                   |
| Activation constant for AMP                | $K_{a,AMP,pfk2}$   | 0.005                  | <i>mM</i>                   |
| Pyruvate kinase maximal flux               | $\bar{v}_{pk}$     | $5 \times 10^{-3}$     | <i>mM * ms<sup>-1</sup></i> |
| Affinity constant for GAP                  | $K_{m,GAP,pk}$     | 0.4                    | <i>mM</i>                   |
| Affinity constant for ADP                  | $K_{m,ADP,pk}$     | 0.005                  | <i>mM</i>                   |

|                                                                          |                         |                         |                      |
|--------------------------------------------------------------------------|-------------------------|-------------------------|----------------------|
| Oxidative phosphorylation maximal flux                                   | $\bar{v}_{op}$          | $1 \times 10^{-3}$      | $mM * ms^{-1}$       |
| Maximal electron transport chain efficiency                              | $\bar{\eta}_{op}$       | 0.995                   | <i>dimensionless</i> |
| Maximal fraction of <i>asyn*</i> effect on the oxidative phosphorylation | $\beta_{op,asyn_{mis}}$ | 0.08                    | <i>dimensionless</i> |
| Affinity constant for <i>asyn*</i>                                       | $K_{asyn_{mis}}$        | $8.5 \times 10^{-3}$    | <i>mM</i>            |
| Affinity constant for PYR                                                | $K_{m,PYR,op}$          | 0.5                     | <i>mM</i>            |
| Affinity constant for ADP                                                | $K_{m,ADP,op}$          | 0.005                   | <i>mM</i>            |
| Forward reaction constant of LDH                                         | $k_{ldh,f}$             | $12.5 \times 10^{-3}$   | $ms^{-1}$            |
| Reverse reaction constant of LDH                                         | $k_{ldh,r}$             | $2.5355 \times 10^{-3}$ | $ms^{-1}$            |
| Maximal lactate fermentation efficiency                                  | $\bar{\eta}_{ldh}$      | 1                       | <i>dimensionless</i> |
| Maximal fraction of <i>ROS</i> effect on the lactate fermentation        | $\beta_{ldh,ROS}$       | 0.25                    | <i>dimensionless</i> |
| Affinity constant for <i>ROS</i>                                         | $K_{ldh,ROS}$           | $10 \times 10^{-3}$     | <i>mM</i>            |
| MCT maximal influx                                                       | $\bar{v}_{lac}$         | $3.55 \times 10^{-4}$   | $mM * ms^{-1}$       |
| Coefficient constant for MCT influx                                      | $K_{lac,inf}$           | 0.641                   | <i>dimensionless</i> |
| Reaction constant for lactate efflux                                     | $K_{lac,eff}$           | $7.1 \times 10^{-4}$    | $ms^{-1}$            |
| ATPase maximal flux                                                      | $\bar{v}_{ATPase}$      | $9.355 \times 10^{-4}$  | $mM * ms^{-1}$       |
| Affinity constant for ATP                                                | $K_{m,ATP}$             | 0.5                     | <i>mM</i>            |
| PPP maximal flux                                                         | $\bar{v}_{ppp}$         | $3.972 \times 10^{-4}$  | $mM * ms^{-1}$       |
| Inhibition constant for $\left(\frac{NADPH}{NADP}\right)$                | $K_{i,NADPH}$           | 20                      | <i>dimensionless</i> |

|                                    |                 |                        |                     |
|------------------------------------|-----------------|------------------------|---------------------|
| Total NADPH and NADP concentration | $[NADPH_{tot}]$ | 0.25                   | $mM$                |
| GR forward reaction constant       | $k_{gr,f}$      | $1.8 \times 10^{-4}$   | $mM^{-1} * ms^{-1}$ |
| GR reverse reaction constant       | $k_{gr,r}$      | $3.472 \times 10^{-7}$ | $mM^{-1} * ms^{-1}$ |
| Total GSH and GSSG concentration   | $[GSH_{tot}]$   | 2.5                    | $mM$                |
| Reaction constant of DOX           | $K_{dox,ROS}$   | $7.5 \times 10^{-8}$   | $ms^{-1}$           |
| CK forward reaction constant       | $k_{ck,f}$      | $3 \times 10^{-3}$     | $mM^{-1} * ms^{-1}$ |
| CK reverse reaction constant       | $k_{ck,r}$      | $1.26 \times 10^{-3}$  | $mM^{-1} * ms^{-1}$ |
| Total PCr and Cr concentration     | $[PCr_{tot}]$   | 20                     | $mM$                |

**Supplementary Table-3.6:** Steady state values of energy metabolism of SNc cell model<sup>3,4</sup>.

| Symbol    | Value                    | Symbol    | Value      |
|-----------|--------------------------|-----------|------------|
| $[F6P]$   | 0.176 $mM$               | $[LAC]$   | 0.598 $mM$ |
| $[F26P]$  | $2.2 \times 10^{-3} mM$  | $[PCr]$   | 18.04 $mM$ |
| $[GAP]$   | $8.25 \times 10^{-2} mM$ | $[NADPH]$ | 0.25 $mM$  |
| $[PYR]$   | 0.124 $mM$               | $[GSH]$   | 2.5 $mM$   |
| $[ATP_i]$ | 2.4 $mM$                 |           |            |

**Supplementary Table-3.7:** Parameter values for DA turnover processes of SNc cell model<sup>5,6</sup>.

| Constant                           | Symbol     | Value      | Units          |
|------------------------------------|------------|------------|----------------|
| Average release flux per vesicle   | $\psi$     | 17.4391793 | $mM * ms^{-1}$ |
| Initial vesicular DA concentration | $DA_{v_o}$ | 500        | $mM$           |

|                                                         |                           |                       |                      |
|---------------------------------------------------------|---------------------------|-----------------------|----------------------|
| Sensitivity to vesicular DA concentration               | $DA_{v_s}$                | 0.01                  | $mM$                 |
| Affinity constant of DA binding to receptors            | $DA_{R_a}$                | $5 \times 10^{-5}$    | $mM$                 |
| Binding sensitivity                                     | $DA_{R_s}$                | 0.01                  | $mM$                 |
| Activation constant for ATP                             | $K_{a,RRP}$               | 1.4286                | $mM$                 |
| Vesicle recycling maximal flux                          | $\bar{v}_{nrrp}$          | $1 \times 10^{-3}$    | $mM * ms^{-1}$       |
| Maximal vesicle recycling efficiency                    | $\bar{\eta}_{nrrp}$       | 0.995                 | <i>dimensionless</i> |
| Maximal fraction of <i>asyn</i> * effect on the vesicle | $\beta_{nrrp,asyn_{mis}}$ | 0.08                  | <i>dimensionless</i> |
| Affinity constant for <i>asyn</i> *                     | $K_{asyn_{mis}}$          | $8.5 \times 10^{-3}$  | $mM$                 |
| Reaction constant of $DA_e$ clearance                   | $k_{comt}$                | 0.0083511             | $ms^{-1}$            |
| Tyrosine concentration                                  | [TYR]                     | $126 \times 10^{-3}$  | $mM$                 |
| Affinity constant for TYR                               | $K_{TYR}$                 | $46 \times 10^{-3}$   | $mM$                 |
| Inhibition constant for $DA_c$                          | $K_{i,cda}$               | $11 \times 10^{-2}$   | $mM$                 |
| Inhibition constant for $DA_e$                          | $K_{i,eda}$               | $46 \times 10^{-3}$   | $mM$                 |
| Maximal velocity of DA synthesis                        | $\bar{V}_{synt}$          | $25 \times 10^{-6}$   | $mM * ms^{-1}$       |
| Affinity constant for $Ca_i$                            | $K_{synt}$                | $35 \times 10^{-4}$   | $mM$                 |
| Maximal velocity of VMAT                                | $\bar{V}_{cda}$           | $4.67 \times 10^{-6}$ | $ms^{-1}$            |
| Affinity constant for $DA_c$                            | $K_{cda}$                 | $238 \times 10^{-4}$  | $mM$                 |
| Scaling factor for VMAT                                 | $\alpha_{vmat}$           | $1 \times 10^{-3}$    | <i>dimensionless</i> |
| Scaling factor for $ATP_i$                              | $\beta_{vmat}$            | 3                     | <i>dimensionless</i> |
| Reaction constant of $DA_c$ clearance                   | $k_{mao}$                 | 0.00016               | $ms^{-1}$            |
| Maximal velocity of AADC                                | $\bar{V}_{aadc}$          | $9.73 \times 10^{-5}$ | $mM * ms^{-1}$       |

|                                                |                 |                       |                             |
|------------------------------------------------|-----------------|-----------------------|-----------------------------|
| Affinity constant for <i>LDOPA</i>             | $K_{aadc}$      | 0.13                  | <i>mM</i>                   |
| Maximal velocity of AAT                        | $\bar{V}_{aat}$ | $5.11 \times 10^{-7}$ | <i>mM * ms<sup>-1</sup></i> |
| Affinity constant for <i>LDOPA<sub>e</sub></i> | $K_{ldopa_e}$   | $3.2 \times 10^{-4}$  | <i>mM</i>                   |
| Affinity constant for <i>TYR<sub>e</sub></i>   | $K_{tyr_e}$     | $6.4 \times 10^{-4}$  | <i>mM</i>                   |
| Affinity constant for <i>TRP<sub>e</sub></i>   | $K_{trp_e}$     | $1.5 \times 10^{-4}$  | <i>mM</i>                   |
| Serum concentration of TYR                     | $[TYR_e]$       | $6.3 \times 10^{-4}$  | <i>mM</i>                   |
| Serum concentration of TRP                     | $[TRP_e]$       | $8.2 \times 10^{-4}$  | <i>mM</i>                   |
| Serum concentration of LDOPA                   | $[sLD]$         | $3.6 \times 10^{-3}$  | <i>mM</i>                   |

**Supplementary Table-3.8:** Steady state values of DA turnover processes of SNc cell model<sup>5,6</sup>.

| Symbol   | Value                         | Symbol    | Value                           |
|----------|-------------------------------|-----------|---------------------------------|
| $[DA_e]$ | $4 \times 10^{-6} \text{ mM}$ | $[DA_v]$  | 500 <i>mM</i>                   |
| $[DA_c]$ | $1 \times 10^{-4} \text{ mM}$ | $[LDOPA]$ | $3.6 \times 10^{-4} \text{ mM}$ |

**Supplementary Table-3.9:** Parameter values of PD pathology pathways of SNc cell model<sup>4</sup>.

| Constant                                                    | Symbol       | Value                  | Units                                    |
|-------------------------------------------------------------|--------------|------------------------|------------------------------------------|
| Activation constant for ATP                                 | $K_{a,leak}$ | 0.5282                 | <i>mM</i>                                |
| Reaction constant for ROS production due to excess dopamine | $k_{dopa}$   | $4.167 \times 10^{-4}$ | <i>mM<sup>-1</sup> * ms<sup>-1</sup></i> |
| Affinity constant for $[DA_c]$                              | $K_{dopa}$   | 8.5                    | <i>mM</i>                                |
| Reaction constant for catalase                              | $k_{cat}$    | $2.35 \times 10^{-5}$  | <i>ms<sup>-1</sup></i>                   |
| Reaction constant for alpha-synuclein oxidation             | $k_{syn}$    | $1.39 \times 10^{-8}$  | <i>mM * ms<sup>-1</sup></i>              |



|                                                                  |               |                        |                      |
|------------------------------------------------------------------|---------------|------------------------|----------------------|
| Reaction constant for alpha-synuclein consumption                | $k_{to}$      | $1.39 \times 10^{-7}$  | $ms^{-1}$            |
| Reaction constant for alpha-synuclein aggregation                | $k_{agg}$     | $2.08 \times 10^{-10}$ | $ms^{-1}$            |
| Affinity constant for $ASYN_{mis}$                               | $K_{agg}$     | $7.5 \times 10^{-3}$   | $mM$                 |
| Reaction constant for tagging of damaged protein                 | $k_{tag}$     | $7.64 \times 10^{-11}$ | $mM^{-1} * ms^{-1}$  |
| Total ubiquitin concentration                                    | $[Ub_{tot}]$  | $10.5 \times 10^{-3}$  | $mM$                 |
| Reaction constant for damaged protein disposal by the proteasome | $k_{prt}$     | $2.08 \times 10^{-10}$ | $ms^{-1}$            |
| Affinity constant for $ASYN_{agg}$                               | $K_{prt}$     | $5 \times 10^{-3}$     | $mM$                 |
| Fraction reduction of proteasome activity by $ASYN_{agg}$        | $\beta_{prt}$ | 0.25                   | <i>dimensionless</i> |
| Reaction constant for $ASYN_{agg}$ disposal by lysosome          | $k_{lyso}$    | $2.08 \times 10^{-11}$ | $ms^{-1}$            |
| Reaction constant for Lewy bodies from $ASYN_{agg}$              | $k_{lb}$      | $2.08 \times 10^{-11}$ | $ms^{-1}$            |
| Affinity constant for $ASYN_{agg}$                               | $K_{lb}$      | $5 \times 10^{-3}$     | $mM$                 |

**Supplementary Table-3.10:** Steady state values of PD pathology pathways of SNc cell model<sup>4</sup>.

| Symbol         | Value                 | Symbol         | Value                 |
|----------------|-----------------------|----------------|-----------------------|
| $[ROS]$        | $1 \times 10^{-3} mM$ | $[ASYN_{tag}]$ | $1 \times 10^{-5} mM$ |
| $[ASYN]$       | $0.1 mM$              | $[ASYN_{agg}]$ | $0 mM$                |
| $[ASYN_{mis}]$ | $1 \times 10^{-3} mM$ | $[LB]$         | $0 mM$                |

**Supplementary Table-3.11:** Parameter values of apoptotic pathways of SNc cell model<sup>7</sup>.

| Constant                                            | Symbol     | Value               | Units               |
|-----------------------------------------------------|------------|---------------------|---------------------|
| Forward reaction constant for $[Ca_i, Calpain]$     | $k_1^+$    | 1                   | $mM^{-1} * ms^{-1}$ |
| Reverse reaction constant for $[Ca_i, Calpain]$     | $k_1^-$    | $1 \times 10^{-3}$  | $ms^{-1}$           |
| Forward reaction constant for $[Calpain^*]$         | $k_2^+$    | $1 \times 10^{-3}$  | $ms^{-1}$           |
| Forward reaction constant for $[Calpain^*, Casp12]$ | $k_3^+$    | 1                   | $mM^{-1} * ms^{-1}$ |
| Reverse reaction constant for $[Calpain^*, Casp12]$ | $k_3^-$    | $1 \times 10^{-3}$  | $ms^{-1}$           |
| Forward reaction constant for $[Casp12^*]$          | $k_4^+$    | $1 \times 10^{-3}$  | $ms^{-1}$           |
| Forward reaction constant for $[Casp12^*, Casp9]$   | $k_5^+$    | 10                  | $mM^{-1} * ms^{-1}$ |
| Reverse reaction constant for $[Casp12^*, Casp9]$   | $k_5^-$    | $5 \times 10^{-4}$  | $ms^{-1}$           |
| Forward reaction constant for $[Casp9^*]$           | $k_6^+$    | $1 \times 10^{-3}$  | $ms^{-1}$           |
| Forward reaction constant for $[Casp9^*, Casp3]$    | $k_7^+$    | 10                  | $mM^{-1} * ms^{-1}$ |
| Reverse reaction constant for $[Casp9^*, Casp3]$    | $k_7^-$    | $5 \times 10^{-4}$  | $ms^{-1}$           |
| Forward reaction constant for $[Casp3^*]$           | $k_8^+$    | $1 \times 10^{-4}$  | $ms^{-1}$           |
| Forward reaction constant for $[Apop]$              | $k_9^+$    | 1                   | $mM^{-1} * ms^{-1}$ |
| Forward reaction constant for $[Casp9^*]$           | $k_{10}^+$ | $1 \times 10^{-3}$  | $ms^{-1}$           |
| Forward reaction constant for $[Casp9^*, IAP]$      | $k_{11}^+$ | 5                   | $mM^{-1} * ms^{-1}$ |
| Reverse reaction constant for $[Casp9^*, IAP]$      | $k_{11}^-$ | $35 \times 10^{-7}$ | $ms^{-1}$           |
| Forward reaction constant for $[Casp3^*, IAP]$      | $k_{12}^+$ | 5                   | $mM^{-1} * ms^{-1}$ |
| Reverse reaction constant for $[Casp3^*, IAP]$      | $k_{12}^-$ | $35 \times 10^{-7}$ | $ms^{-1}$           |
| Forward reaction constant for $[ROS_{mit}]$         | $k_{13}^+$ | 0.5                 | $mM^{-1} * ms^{-1}$ |
| Forward reaction constant for $[PTP_{mit}^*]$       | $k_{14}^+$ | 0.5                 | $mM^{-1} * ms^{-1}$ |
| Forward reaction constant for $[Cytc]$              | $k_{15}^+$ | 1                   | $mM^{-1} * ms^{-1}$ |

|                                              |            |                    |                     |
|----------------------------------------------|------------|--------------------|---------------------|
| Forward reaction constant for $[Cytc.Casp9]$ | $k_{16}^+$ | 1                  | $mM^{-1} * ms^{-1}$ |
| Reverse reaction constant for $[Cytc.Casp9]$ | $k_{16}^-$ | $1 \times 10^{-3}$ | $ms^{-1}$           |

**Supplementary Table-3.12:** Steady state values of energy metabolism of SNc cell model<sup>7</sup>.

| Symbol               | Value | Symbol            | Value |
|----------------------|-------|-------------------|-------|
| $[Calpain]$          | 1     | $[ROS_{mit}]$     | 0     |
| $[Ca_i.Calpain]$     | 0     | $[PTP_{mit}^*]$   | 1     |
| $[Calpain^*]$        | 0     | $[Cytc_{mit}]$    | 1     |
| $[Casp12]$           | 1     | $[Cytc]$          | 0     |
| $[Calpain^*.Casp12]$ | 0     | $[Cytc.Casp9]$    | 0     |
| $[Casp12^*]$         | 0     | $[Casp9]$         | 1     |
| $[Casp12^*.Casp9]$   | 0     | $[Casp9^*]$       | 0     |
| $[Casp3]$            | 1     | $[Casp9^*.Casp3]$ | 0     |
| $[Casp3^*]$          | 0     | $[IAP]$           | 1     |
| $[Casp9^*.IAP]$      | 0     | $[Casp3^*.IAP]$   | 0     |
| $[Apop]$             | 0     |                   |       |

**Supplementary Table-3.13:** Parameters for energy consumption processes of SNc cell model.

| Constant                     | Symbol       | Value                  | Units                 |
|------------------------------|--------------|------------------------|-----------------------|
| Faraday's constant           | $F$          | 96485                  | $coulomb * mole^{-1}$ |
| Cytosolic volume             | $v_{cyt}$    | $\phi_{cyt} * v_{pmu}$ | $pl$                  |
| Pacemaking unit (PMU) volume | $v_{pmu}$    | 5                      | $pl$                  |
| Fraction of cytosolic volume | $\phi_{cyt}$ | 0.5                    | $dimensionless$       |

|                                                            |                  |        |                      |
|------------------------------------------------------------|------------------|--------|----------------------|
| Scaling factor for synaptic recycling                      | $\lambda_{sr}$   | 100    | <i>dimensionless</i> |
| Scaling factor for neurotransmitter packing                | $\lambda_{np}$   | 1      | <i>dimensionless</i> |
| Ratio of free calcium to total calcium concentration in ER | $\beta_{er}$     | 0.0025 | <i>dimensionless</i> |
| Volume ratio between the ER and cytosol                    | $\rho_{er}$      | 0.01   | <i>dimensionless</i> |
| Scaling factor for proteasome                              | $\lambda_{prt}$  | 25     | <i>dimensionless</i> |
| Scaling factor for ubiquitination                          | $\lambda_{tag}$  | 3      | <i>dimensionless</i> |
| Scaling factor for lysosome                                | $\lambda_{lyso}$ | 10     | <i>dimensionless</i> |

## SUPPLEMENTARY MATERIALS

### Supplementary Material-1

#### Receptor Modeling<sup>43</sup>

##### AMPA/Kainate Receptors

The simplest model that approximates the kinetics of the fast AMPA/kainate type of glutamate receptors can be represented by the two-state diagram:

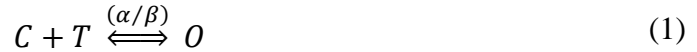

where,  $\alpha$  and  $\beta$  are voltage-independent forward and backward rate constants,  $C$  is the closed state of the receptor,  $O$  is the open state of the receptor, and  $T$  is the neurotransmitter. If  $r$  is defined as the fraction of the receptors in the open state, it is then described by the following first-order kinetic equation:

$$\frac{d(r)}{dt} = \alpha * [T] * (1 - r) - \beta * r \quad (2)$$

and the postsynaptic current ( $I_{AMPA}$ ) is given by,

$$I_{AMPA} = \bar{g}_{AMPA} * r * (V - E_{AMPA}) \quad (3)$$

where,  $\bar{g}_{AMPA}$  is the maximal conductance,  $E_{AMPA}$  is the reversal potential,  $V$  is the postsynaptic membrane potential,  $[T]$  is the neurotransmitter, and  $r$  is the fraction of the receptors in the open state.

##### NMDA Receptors

The slower NMDA type of glutamate receptors can be represented with a two-state model similar to AMPA/kainate receptors, with a voltage-dependent term representing magnesium block. Using the scheme in Eqs. 1 and 2, the postsynaptic current is given by

$$I_{NMDA} = \bar{g}_{NMDA} * r * B(V) * (V - E_{NMDA}) \quad (4)$$

where,  $\bar{g}_{NMDA}$  is the maximal conductance,  $E_{NMDA}$  is the reversal potential,  $B(V)$  is the magnesium block,  $V$  is the postsynaptic membrane potential, and  $r$  is the fraction of the receptors in the open state.

$$B(V) = \frac{1}{1 + \left( \frac{[Mg^{2+}]}{3.57} * e^{-0.062 * V} \right)} \quad (5)$$

where,  $[Mg^{2+}]$  is the external magnesium concentration, and  $V$  is the postsynaptic membrane potential.

### **GABA<sub>A</sub> Receptors**

GABA<sub>A</sub> receptors can also be represented by the scheme in Eqs. 1 and 2, with the postsynaptic current given by

$$I_{GABA_A} = \bar{g}_{GABA_A} * r * (V - E_{GABA_A}) \quad (6)$$

where,  $\bar{g}_{GABA_A}$  is the maximal conductance,  $E_{GABA_A}$  is the reversal potential,  $V$  is the postsynaptic membrane potential, and  $r$  is the fraction of the receptors in the open state.

### **GABA<sub>B</sub> Receptors**

The stimulus dependency of GABA<sub>B</sub> responses, unfortunately, cannot be handled correctly by a two-state model. The simplest model of GABA<sub>B</sub>-mediated currents has two variables:

$$\frac{d(r)}{dt} = K_1 * [T] * (1 - r) - K_2 * r \quad (7)$$

$$\frac{d(s)}{dt} = K_3 * r - K_4 * s \quad (8)$$

and the postsynaptic current ( $I_{GABA_B}$ ) is given by,

$$I_{GABA_B} = \bar{g}_{GABA_B} * \frac{s^n}{s^n + K_d} * (V - E_{GABA_B}) \quad (9)$$

where,  $\bar{g}_{GABA_B}$  is the maximal conductance,  $E_{GABA_B}$  ( $= V_K$ ) is the reversal potential,  $V$  is the postsynaptic membrane potential,  $r$  is the fraction of the receptors in the open state,  $s$  is the fraction of activated G-proteins,  $K_d$  is the dissociation constant of the binding of  $s$  on the  $K^+$  channels,  $K_1$  and  $K_2$  are voltage-independent forward and backward rate constants for  $r$ ,  $K_3$  and  $K_4$  are voltage-independent forward and backward rate constants for  $s$ , and  $[T]$  is the neurotransmitter.

### Overall Synaptic Current

The overall synaptic input current flux ( $J_{syn}$ ) to SNc neuron is given by,

$$J_{syn} = -\frac{1}{F * vol_{cyt}} * (I_{AMPA} + I_{NMDA} + I_{GABA_A} + I_{GABA_B}) \quad (10)$$

where,  $I_{AMPA}$  is the excitatory AMPA synaptic current,  $I_{NMDA}$  is the excitatory NMDA synaptic current,  $I_{GABA_A}$  is the inhibitory GABA<sub>A</sub> synaptic current,  $I_{GABA_B}$  is the inhibitory GABA<sub>B</sub> synaptic current,  $F$  is the Faraday's constant, and  $vol_{cyt}$  is the cytosolic volume.

**Table-1:** Parameter values of receptor models

| Constant                             | Symbol           | Value                    | Units                              |
|--------------------------------------|------------------|--------------------------|------------------------------------|
| Faraday's constant                   | $F$              | 96485                    | <i>coulomb * mole<sup>-1</sup></i> |
| Cytosolic volume                     | $vol_{cyt}$      | $\phi_{cyt} * vol_{pmu}$ | <i>pl</i>                          |
| Fraction of cytosolic volume         | $\phi_{cyt}$     | 0.5                      | <i>dimensionless</i>               |
| Pacemaking unit (PMU) volume         | $vol_{pmu}$      | 5                        | <i>pl</i>                          |
| Maximal conductance of AMPA receptor | $\bar{g}_{AMPA}$ | 0.35 – 1                 | <i>nS</i>                          |
| Maximal conductance of NMDA receptor | $\bar{g}_{NMDA}$ | 0.01 – 0.6               | <i>nS</i>                          |
| Concentration of Magnesium           | $[Mg^{2+}]$      | 1 – 2                    | <i>mM</i>                          |

|                                                                                 |                    |                   |                      |
|---------------------------------------------------------------------------------|--------------------|-------------------|----------------------|
| Maximal conductance of GABA <sub>A</sub> receptor                               | $\bar{g}_{GABA_A}$ | 0.25 – 1.2        | nS                   |
| Maximal conductance of GABA <sub>B</sub> receptor                               | $\bar{g}_{GABA_B}$ | 0.06              | nS                   |
| Dissociation constant of the binding of <i>s</i> on the K <sup>+</sup> channels | $K_d$              | 100               | $\mu M^4$            |
| Voltage-independent forward rate constant for <i>r</i> of GABA <sub>B</sub>     | $K_1$              | $9 \times 10^4$   | $M^{-1} * sec^{-1}$  |
| Voltage-independent backward rate constant for <i>r</i> of GABA <sub>B</sub>    | $K_2$              | 1.2               | $sec^{-1}$           |
| Voltage-independent forward rate constant for <i>s</i> of GABA <sub>B</sub>     | $K_3$              | 180               | $sec^{-1}$           |
| Voltage-independent backward rate constant for <i>s</i> of GABA <sub>B</sub>    | $K_4$              | 34                | $sec^{-1}$           |
| Cooperativity constant (binding sites)                                          | $n$                | 4                 | <i>dimensionless</i> |
| Reversal potential of AMPA                                                      | $E_{AMPA}$         | 0                 | mV                   |
| Reversal potential of NMDA                                                      | $E_{NMDA}$         | 0                 | mV                   |
| Reversal potential of GABA <sub>A</sub>                                         | $E_{GABA_A}$       | -80               | mV                   |
| Reversal potential of GABA <sub>B</sub>                                         | $E_{GABA_B}$       | -95               | mV                   |
| Voltage-independent forward rate constant for <i>r</i> ( $\alpha$ )             | AMPA               | $1.1 \times 10^6$ | $M^{-1} * sec^{-1}$  |
|                                                                                 | NMDA               | $7.2 \times 10^4$ | $M^{-1} * sec^{-1}$  |
|                                                                                 | GABA <sub>A</sub>  | $5 \times 10^6$   | $M^{-1} * sec^{-1}$  |
| Voltage-independent backward rate constant for <i>r</i> ( $\beta$ )             | AMPA               | 190               | $sec^{-1}$           |
|                                                                                 | NMDA               | 6.6               | $sec^{-1}$           |



|  |                   |     |                   |
|--|-------------------|-----|-------------------|
|  | GABA <sub>A</sub> | 180 | sec <sup>-1</sup> |
|--|-------------------|-----|-------------------|

## References:

1. Francis, F., García, M. R. & Middleton, R. H. A single compartment model of pacemaking in disassociated substantia nigra neurons: stability and energy analysis. *J. Comput. Neurosci.* **35**, 295–316 (2013).
2. Marhl, M., Haberichter, T., Brumen, M. & Heinrich, R. Complex calcium oscillations and the role of mitochondria and cytosolic proteins. *BioSystems* **57**, 75–86 (2000).
3. Cloutier, M. & Wellstead, P. The control systems structures of energy metabolism. *J. R. Soc. Interface* **7**, 651–665 (2010).
4. Cloutier, M. & Wellstead, P. Dynamic modelling of protein and oxidative metabolisms simulates the pathogenesis of Parkinson's disease. *IET Syst. Biol.* **6**, 65–72 (2012).
5. Reed, M. C., Nijhout, H. F. & Best, J. A. Mathematical Insights into the Effects of Levodopa. *Front. Integr. Neurosci.* **6**, 1–24 (2012).
6. Tello-Bravo, D. A Mathematical Model of Dopamine Neurotransmission. *ASU Libraries Thesis*, (Arizona State University, 2012).
7. Hong, J.-Y. *et al.* Computational modeling of apoptotic signaling pathways induced by cisplatin. *BMC Syst. Biol.* **6**, 122 (2012).
8. Li, Y., Bertram, R. & Rinzel, J. Modeling N-methyl-D-aspartate-induced bursting in dopamine neurons. *Neuroscience* **71**, 397–410 (1996).
9. Amini, B., Clark, J. W. & Canavier, C. C. Calcium dynamics underlying pacemaker-like and burst firing oscillations in midbrain dopaminergic neurons: a computational study. *J. Neurophysiol.* **82**, 2249–61 (1999).
10. Canavier, C. C. Sodium dynamics underlying burst firing and putative mechanisms for the regulation of the firing pattern in midbrain dopamine neurons: A computational approach. *J. Comput. Neurosci.* **6**, 49–69 (1999).
11. Wilson, C. J. & Callaway, J. C. Coupled oscillator model of the dopaminergic neuron of the substantia nigra. *J. Neurophysiol.* **83**, 3084–3100 (2000).
12. Medvedev, G. S., Wilson, C. J., Callaway, J. C. & Kopell, N. Dendritic synchrony and transient dynamics in a coupled oscillator model of the dopaminergic neuron. *J. Comput. Neurosci.* **15**, 53–69 (2003).
13. Medvedev, G. S. & Kopell, N. Synchronization and Transient Dynamics in the Chains of Electrically Coupled Fitzhugh--Nagumo Oscillators. *SIAM J. Appl. Math.* **61**, 1762–1801 (2001).
14. Komendantov, A. O. & Canavier, C. C. Electrical coupling between model midbrain dopamine neurons: effects on firing pattern and synchrony. *J. Neurophysiol.* **87**, 1526–1541 (2002).
15. Komendantov, A. O., Komendantova, O. G., Johnson, S. W. & Canavier, C. C. A modeling study suggests complementary roles for GABA<sub>A</sub> and NMDA receptors and

- the SK channel in regulating the firing pattern in midbrain dopamine neurons. *J. Neurophysiol.* **91**, 346–357 (2004).
16. Canavier, C. C. & Landry, R. S. An increase in AMPA and a decrease in SK conductance increase burst firing by different mechanisms in a model of a dopamine neuron in vivo. *J. Neurophysiol.* **96**, 2549–2563 (2006).
  17. Kuznetsov, A. S., Kopell, N. J. & Wilson, C. J. Transient high-frequency firing in a coupled-oscillator model of the mesencephalic dopaminergic neuron. *J. Neurophysiol.* **95**, 932–947 (2006).
  18. Canavier, C. C., Oprisan, S. a, Callaway, J. C., Ji, H. & Shepard, P. D. Computational model predicts a role for ERG current in repolarizing plateau potentials in dopamine neurons: implications for modulation of neuronal activity. *J. Neurophysiol.* **98**, 3006–3022 (2007).
  19. Kuznetsova, A. Y., Huertas, M. A., Kuznetsov, A. S., Paladini, C. A. & Canavier, C. C. Regulation of firing frequency in a computational model of a midbrain dopaminergic neuron. *J. Comput. Neurosci.* **28**, 389–403 (2010).
  20. Yu, N., Tucker, K. R., Levitan, E. S., Shepard, P. D. & Canavier, C. C. Implications of Cellular Models of Dopamine Neurons for Schizophrenia. in *Progress in molecular biology and translational science* **123**, 53–82 (2014).
  21. Drion, G., Massotte, L., Sepulchre, R. & Seutin, V. How Modeling Can Reconcile Apparently Discrepant Experimental Results: The Case of Pacemaking in Dopaminergic Neurons. *PLoS Comput. Biol.* **7**, e1002050 (2011).
  22. Oster, A. M. & Gutkin, B. S. A reduced model of DA neuronal dynamics that displays quiescence, tonic firing and bursting. *J. Physiol. Paris* **105**, 53–58 (2011).
  23. Ha, J. & Kuznetsov, A. Interaction of NMDA Receptor and Pacemaking Mechanisms in the Midbrain Dopaminergic Neuron. *PLoS One* **8**, e69984 (2013).
  24. Zakharov, D., Lapish, C., Gutkin, B. & Kuznetsov, A. Synergy of AMPA and NMDA Receptor Currents in Dopaminergic Neurons: A Modeling Study. *Front. Comput. Neurosci.* **10**, 1–11 (2016).
  25. Qian, K., Yu, N., Tucker, K. R., Levitan, E. S. & Canavier, C. C. Mathematical analysis of depolarization block mediated by slow inactivation of fast sodium channels in midbrain dopamine neurons. *J. Neurophysiol.* **112**, 2779–2790 (2014).
  26. Yu, N. & Canavier, C. C. A Mathematical Model of a Midbrain Dopamine Neuron Identifies Two Slow Variables Likely Responsible for Bursts Evoked by SK Channel Antagonists and Terminated by Depolarization Block. *J. Math. Neurosci.* **5**, 5 (2015).
  27. Cullen, M. & Wong-Lin, K. Integrated dopaminergic neuronal model with reduced intracellular processes and inhibitory autoreceptors. *IET Syst. Biol.* **9**, 245–258 (2015).
  28. Muddapu, V. R., Mandali, A., Chakravarthy, V. S. & Ramaswamy, S. A Computational Model of Loss of Dopaminergic Cells in Parkinson’s Disease Due to Glutamate-Induced Excitotoxicity. *Front. Neural Circuits* **13**, 11 (2019).
  29. Morozova, E. O., Zakharov, D., Gutkin, B. S., Lapish, C. C. & Kuznetsov, A. Dopamine Neurons Change the Type of Excitability in Response to Stimuli. *PLOS Comput. Biol.* **12**, e1005233 (2016).

30. Morozova, E. O. *et al.* Contribution of synchronized GABAergic neurons to dopaminergic neuron firing and bursting. *J. Neurophysiol.* **116**, 1900–1923 (2016).
31. Knowlton, C., Kutterer, S., Roeper, J. & Canavier, C. C. Calcium dynamics control K-ATP channel-mediated bursting in substantia nigra dopamine neurons: a combined experimental and modeling study. *J. Neurophysiol.* **119**, 84–95 (2018).
32. Rumbell, T. & Kozloski, J. Dimensions of control for subthreshold oscillations and spontaneous firing in dopamine neurons. *PLOS Comput. Biol.* **15**, e1007375 (2019).
33. Porenta, G. & Riederer, P. A Mathematical Model of the Dopaminergic Synapse: Stability and Sensitivity Analyses, and Simulation of Parkinson's Disease and Aging Processes. *Cybern. Syst.* **13**, 257–274 (1982).
34. King, R., Barchas, J. D. & Huberman, B. A. Chaotic behavior in dopamine neurodynamics. *Proc. Natl. Acad. Sci.* **81**, 1244–1247 (1984).
35. Justice, J. B., Nicolaysen, L. C. & Michael, A. C. Modeling the dopaminergic nerve terminal. *J. Neurosci. Methods* **22**, 239–252 (1988).
36. Qi, Z., Miller, G. W. & Voit, E. O. A mathematical model of presynaptic dopamine homeostasis: Implications for schizophrenia. *Pharmacopsychiatry* **41**, S89–S98 (2008).
37. Qi, Z., Miller, G. W. & Voit, E. O. Computational systems analysis of dopamine metabolism. *PLoS One* **3**, e2444 (2008).
38. Best, J. A., Nijhout, H. F. & Reed, M. C. Homeostatic mechanisms in dopamine synthesis and release: a mathematical model. *Theor. Biol. Med. Model.* **6**, 21 (2009).
39. Reed, M. C., Best, J. & Nijhout, H. F. Passive and active stabilization of dopamine in the striatum. *Biosci. Hypotheses* **2**, 240–244 (2009).
40. Dreyer, J. K., Herrik, K. F., Berg, R. W. & Hounsgaard, J. D. Influence of phasic and tonic dopamine release on receptor activation. *J. Neurosci.* **30**, 14273–14283 (2010).
41. Dreyer, J. K. & Hounsgaard, J. Mathematical model of dopamine autoreceptors and uptake inhibitors and their influence on tonic and phasic dopamine signaling. *J. Neurophysiol.* **109**, 171–182 (2013).
42. Büchel, F. *et al.* Parkinson's disease: dopaminergic nerve cell model is consistent with experimental finding of increased extracellular transport of  $\alpha$ -synuclein. *BMC Neurosci.* **14**, 136 (2013).
43. Destexhe, A., Mainen, Z. F. & Sejnowski, T. J. Kinetic models of synaptic transmission. *Methods Neuronal Model.* 1–25 (1998).
